# Supplementary material for: Prediction of cloud condensation nuclei activity for organic compounds using functional group contribution methods
Source: Copernicus journal article supplement (doi:10.5194/gmd-9-111-2016), 2016-01-19
Supplement: Supplementary file 3 [file gmd-9-111-2016-supplement.zip]

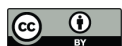

## *Supplement of*

# **Prediction of cloud condensation nuclei activity for organic compounds using functional group contribution methods**

**M. D. Petters et al.**

*Correspondence to:* M. D. Petters ([markus\\_petters@ncsu.edu](mailto:markus_petters@ncsu.edu))

- [gmd-9-111-2016-supplement-title-page.pdf](#)
- [supplement](#)
  - [gmd-2015-172-code](#)
    - \* [README](#)
    - \* [examples](#)
    - \* [license.txt](#)
    - \* [src](#)
  - [gmd-2015-172-si.pdf](#)

The copyright of individual parts of the supplement might differ from the CC-BY 3.0 licence.
