# Supplementary figures and images for: Prediction of cloud condensation nuclei activity for organic compounds using functional group contribution methods
Source: Copernicus journal article supplement (doi:10.5194/gmd-9-111-2016), 2016-01-19

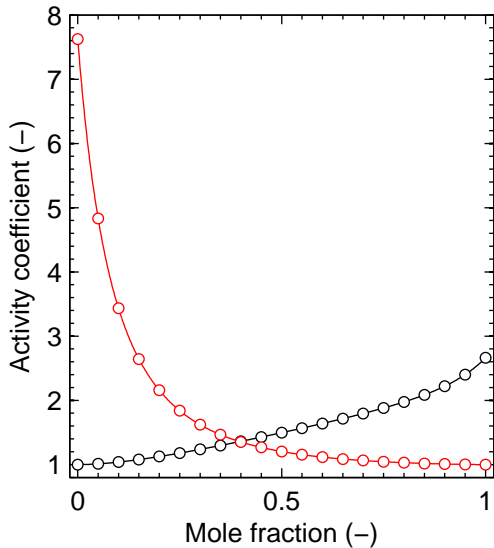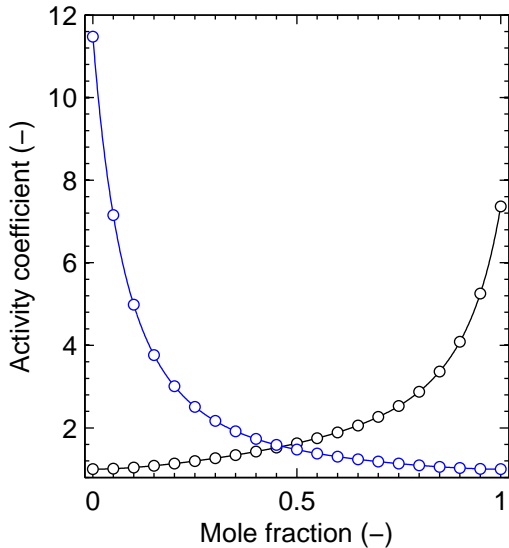

Supplement: Supplementary file 2 [file gmd-9-111-2016-supplement.zip]
